# Supplementary material for: Electrolyte-as-binder strategy using in situ -formed PDOL gel for binder-free cathodes in flexible quasi-solid-state Li–S batteries
Source: Royal Society of Chemistry journal article supplement (doi:10.1039/d5ta08211k), 2025-11-24
Supplement: d5ta08211k1.pdf [file d5ta08211k1.pdf]

## Supporting Information

### **Electrolyte-as-Binder Strategy Using In-Situ-Formed PDOL Gel for Binder-Free Cathodes in Flexible Quasi-Solid-State Li–S Batteries**

*Ingyun Shin<sup>1†</sup>, Yeong-Seok Oh<sup>1</sup>, Seung Woo Seo<sup>1</sup>, Junyoung Heo<sup>2</sup>, Jeong-Jin Yang<sup>4†</sup>,*

*Moongook Jeong<sup>4\*</sup>, Jun-Woo Park<sup>2,3\*</sup>, and Seongki Ahn<sup>1\*</sup>*

<sup>1</sup> Department of Chemical Engineering, Research Center of Chemical Technology, Hankyong

National University, 27, Jungangro, Anseong-si, Gyeonggi-do, Republic of Korea

Email: [skahn@hknu.ac.kr](mailto:skahn@hknu.ac.kr)

<sup>2</sup> Next Generation Battery Research Center, Korea Electrotechnology Research Institute

(KERI), Changwon-si, Gyeongsangnam-do, Republic of Korea

Email: [parkjw@keri.re.kr](mailto:parkjw@keri.re.kr)

<sup>3</sup> Department of Electro-Functionality Materials Engineering, University of Science and

Technology (UST), Daejeon, Republic of Korea

<sup>4</sup> Research Organization for Nano and Life Innovation, Waseda University, 3-4-1, Okubo,

Shinjuku-ku, Tokyo, Japan

Email: [mg-jeong@aoni.waseda.jp](mailto:mg-jeong@aoni.waseda.jp)

† These authors contributed equally to this work.

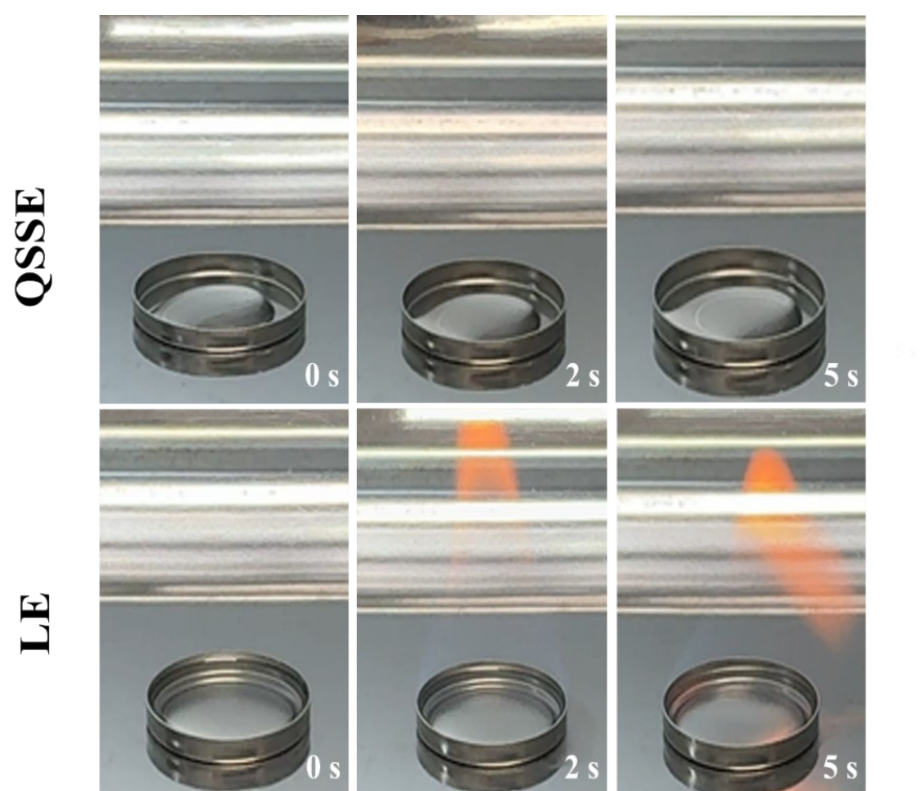

**Figure (S1).** Flammability test of QSSE and LE.

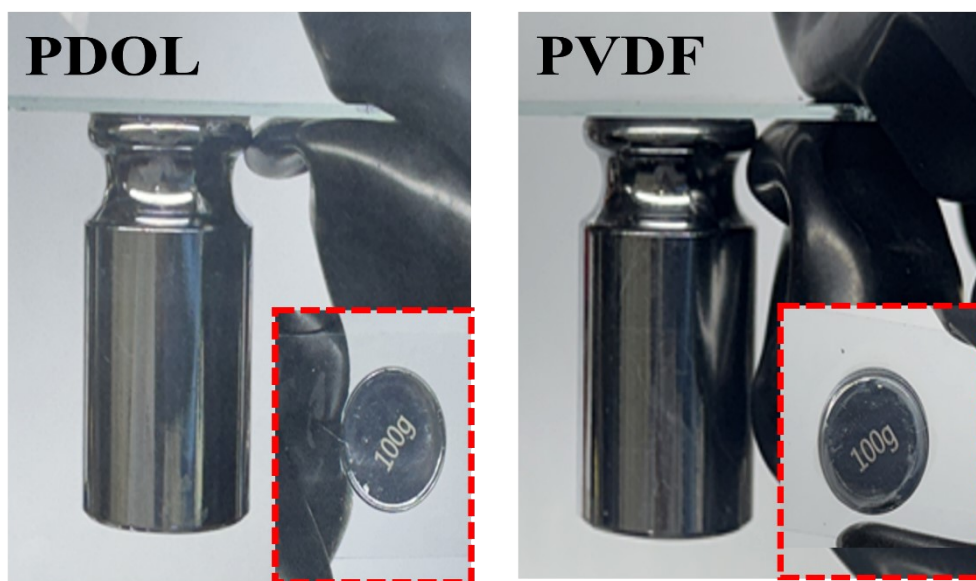

**Figure (S2).** Optical photos of adhesion strength test of PDOL and PVDF.

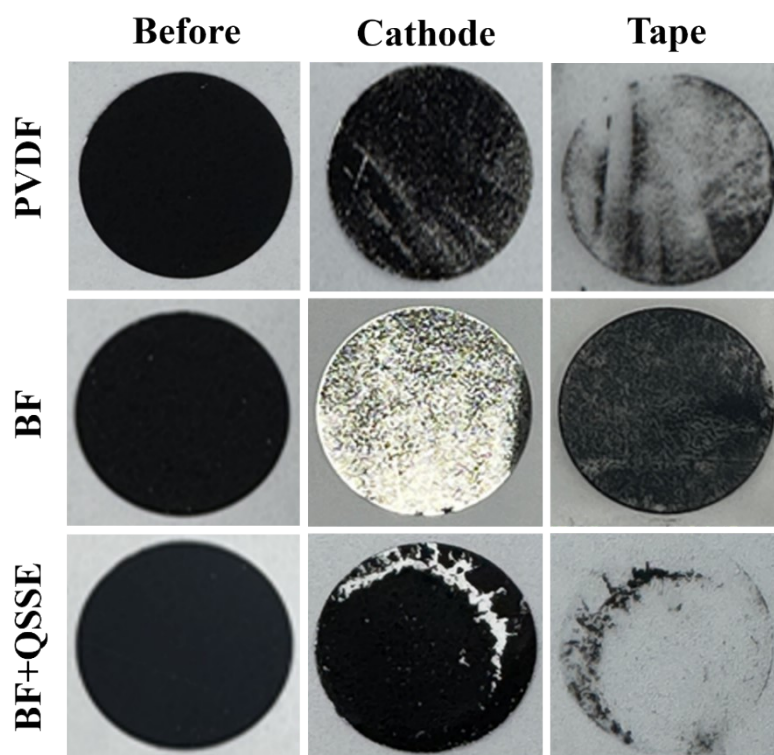

**Figure (S3).** Optical photos of peel tests with cathodes of different cathodes.

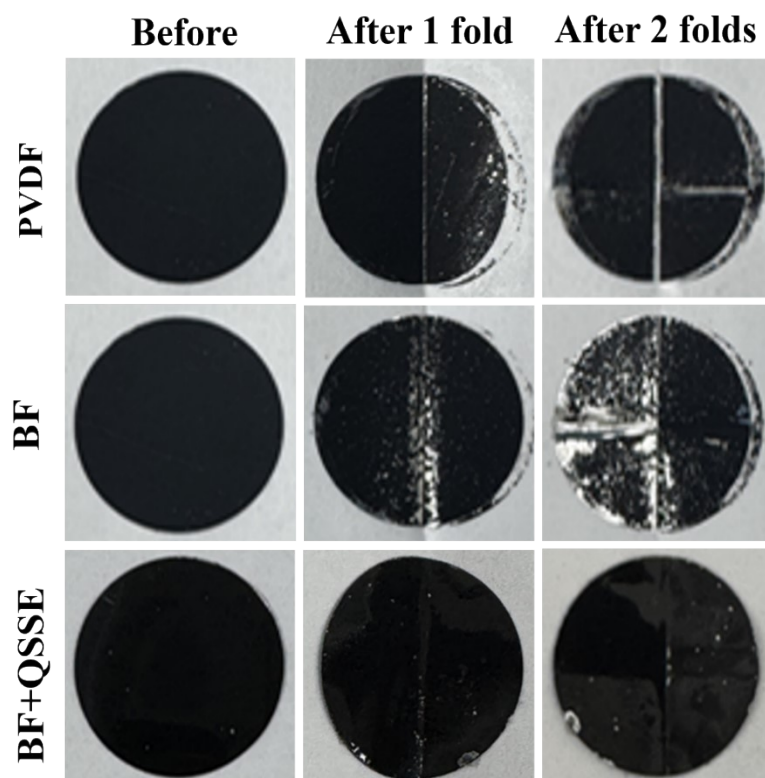

**Figure (S4).** Optical photos of folding tests with cathodes of different cathodes.

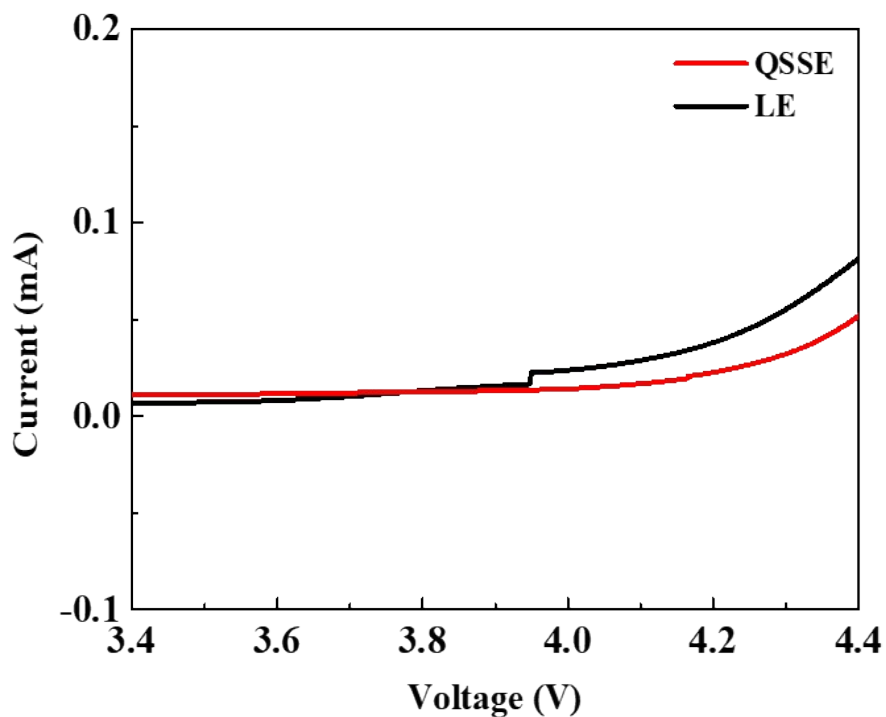

**Figure (S5).** LSV curves of QSSE and LE measured in the voltage range of 3.4–4.4 V.

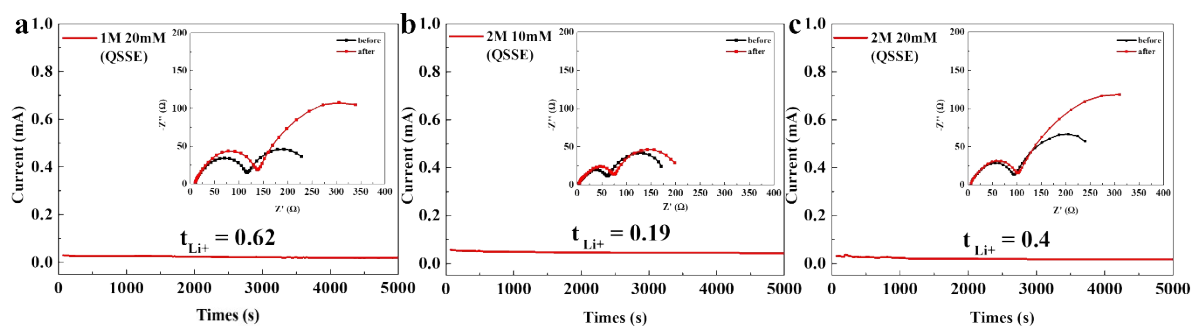

**Figure (S6).** Steady-state polarization curve of the Li/Li symmetric batteries assembled from a) 1M 20mM, b) 2M 10mM and c) 2M 20mM, insets: EIS curves before and after polarization.

**Table S1)** The Li<sup>+</sup>-ion diffusion coefficient values of BF@QSSE coin-cells calculated from the CV measurements.

| BF@QSSE                | A1(cm <sup>2</sup> s <sup>-1</sup> ) | A1(cm <sup>2</sup> s <sup>-1</sup> ) | C1(cm <sup>2</sup> s <sup>-1</sup> ) | C2(cm <sup>2</sup> s <sup>-1</sup> ) |
|------------------------|--------------------------------------|--------------------------------------|--------------------------------------|--------------------------------------|
| 0.1 mV s <sup>-1</sup> | $5.63 \times 10^{-10}$               | $9.38 \times 10^{-10}$               | $3.45 \times 10^{-10}$               | $6.35 \times 10^{-10}$               |
| 0.2 mV s <sup>-1</sup> | $5.52 \times 10^{-9}$                | $1.22 \times 10^{-9}$                | $4.11 \times 10^{-10}$               | $5.81 \times 10^{-10}$               |
| 0.3 mV s <sup>-1</sup> | $6.45 \times 10^{-9}$                | $1.2 \times 10^{-9}$                 | $4.31 \times 10^{-10}$               | $5.18 \times 10^{-10}$               |
| 0.4 mV s <sup>-1</sup> | $6.86 \times 10^{-9}$                | $1.23 \times 10^{-9}$                | $4.60 \times 10^{-10}$               | $4.79 \times 10^{-10}$               |

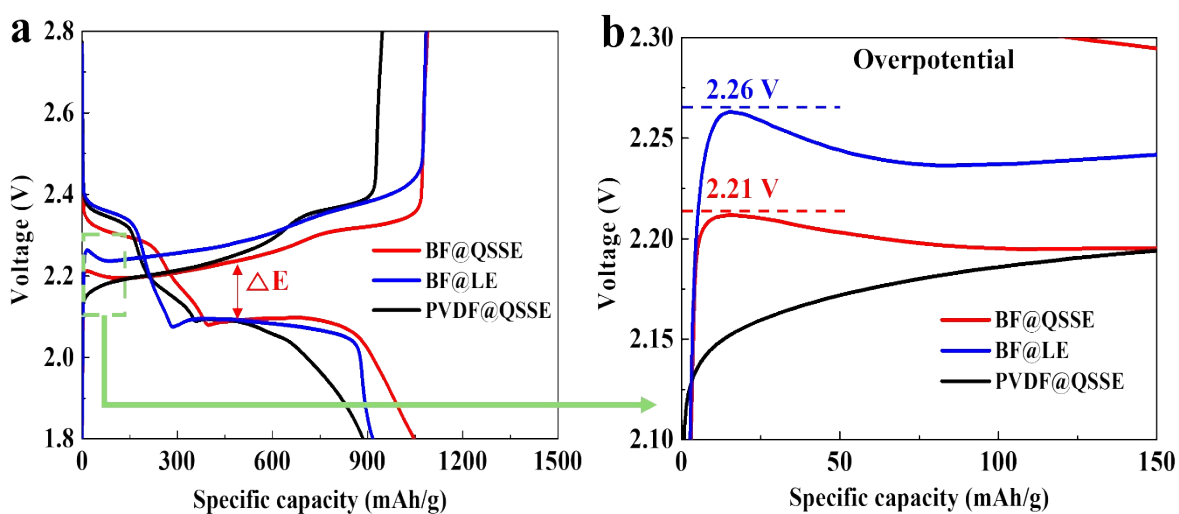

**Figure (S7).** a) Galvanostatic charge-discharge curves of BF@QSSE, BF@LE and PVDF@QSSE at 0.2 C. b) charge process of BF@QSSE, BF@LE and PVDF@QSSE cells showing the overpotentials for conversion between soluble LiPSs and insoluble Li<sub>2</sub>S<sub>2</sub>/Li<sub>2</sub>S.

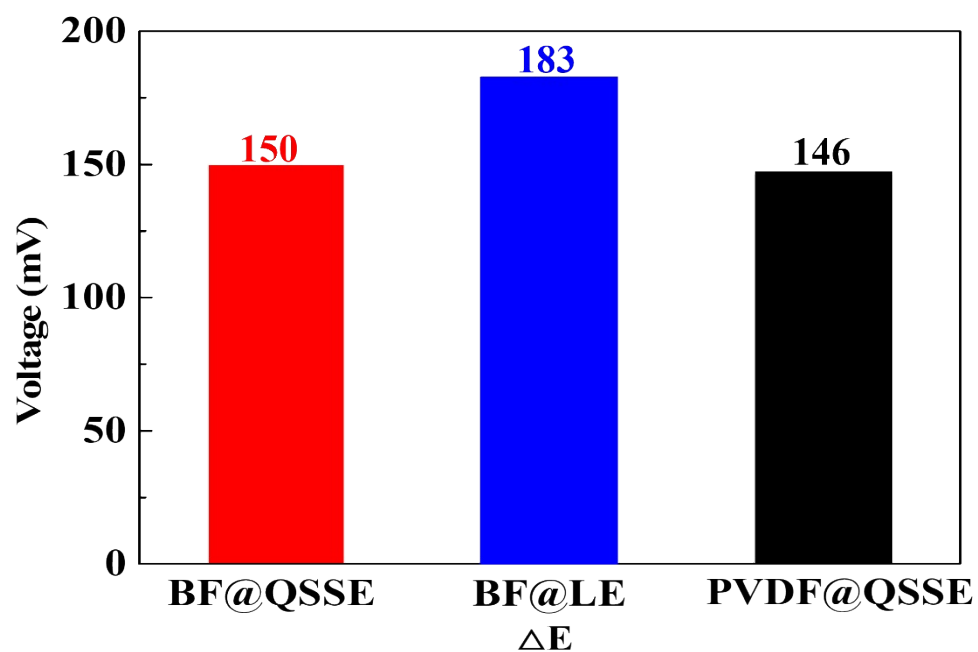

Figure (S8). The values of  $\Delta E$  obtained from charge–discharge voltage curves.

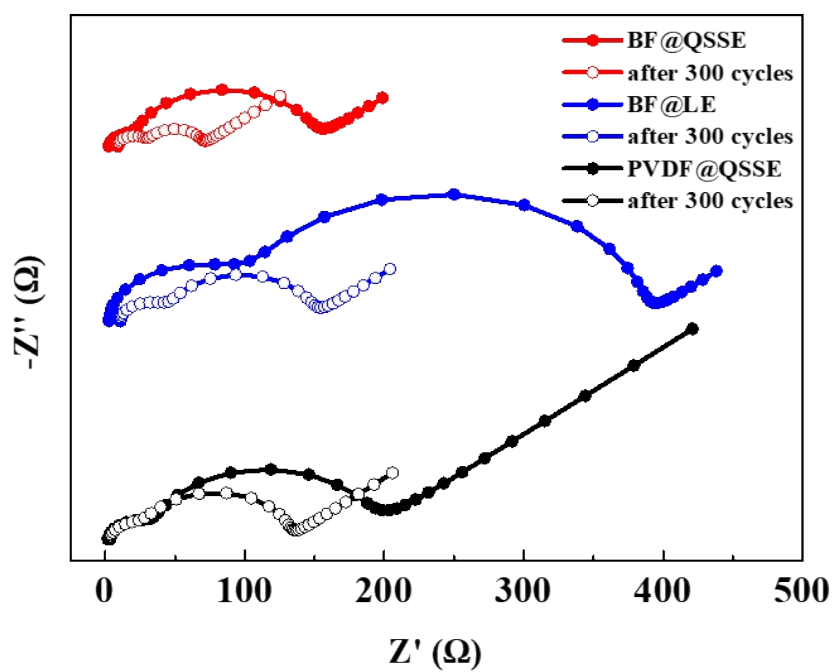

Figure (S9). Nyquist plots of BF@QSSE , BF@LE and PVDF@QSSE.

**Table S2)** EIS fitting parameters of BF@QSSE, BF@LE and PVDF@QSSE after 300 cycles at 1 C.

| BF@QSSE          | $R_b(\Omega)$ | $R_{SEI}(\Omega)$ | $R_{CT}(\Omega)$ |
|------------------|---------------|-------------------|------------------|
| Initial          | 2.48          | 18.17             | 122.64           |
| After 300 cycles | 9.12          | 21.40             | 36.73            |

  

| BF@LE            | $R_b(\Omega)$ | $R_{SEI}(\Omega)$ | $R_{CT}(\Omega)$ |
|------------------|---------------|-------------------|------------------|
| Initial          | 2.78          | 100.93            | 277.62           |
| After 300 cycles | 10.90         | 34.14             | 99.48            |

  

| PVDF@QSSE        | $R_b(\Omega)$ | $R_{SEI}(\Omega)$ | $R_{CT}(\Omega)$ |
|------------------|---------------|-------------------|------------------|
| Initial          | 1.97          | 31.32             | 146.64           |
| After 300 cycles | 3.48          | 24.35             | 101.88           |

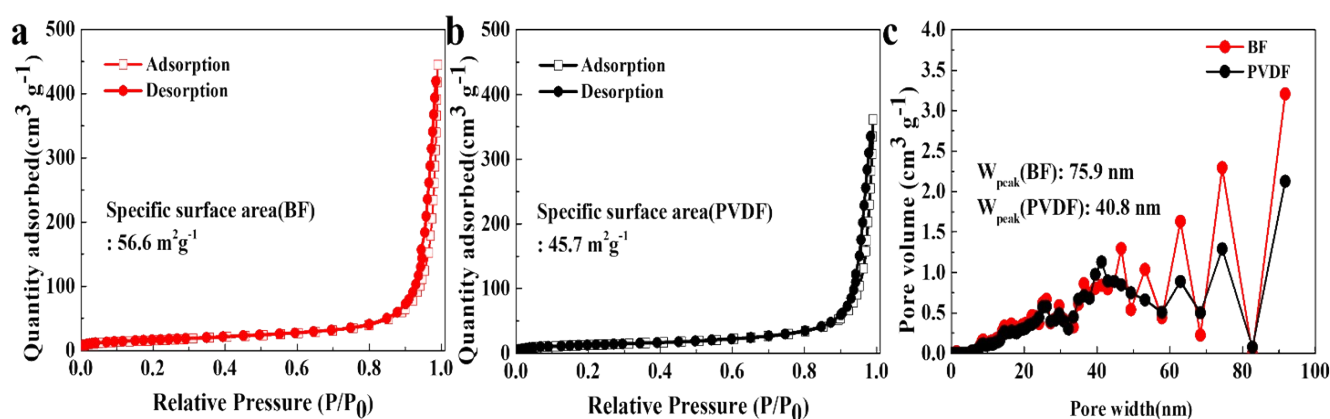

**Figure (S10).**  $N_2$  adsorption–desorption isotherms of a) BF cathode and b) PVDF cathode c) pore size distribution of BF cathode and PVDF cathode.

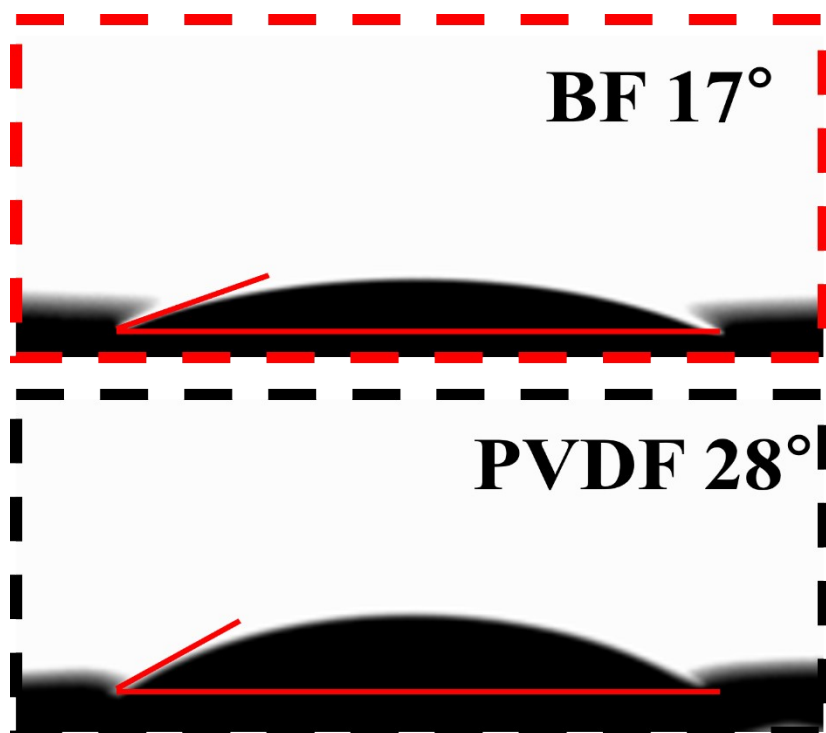

Figure (S11). Contact angle measurement of the BF cathode and PVDF cathode.

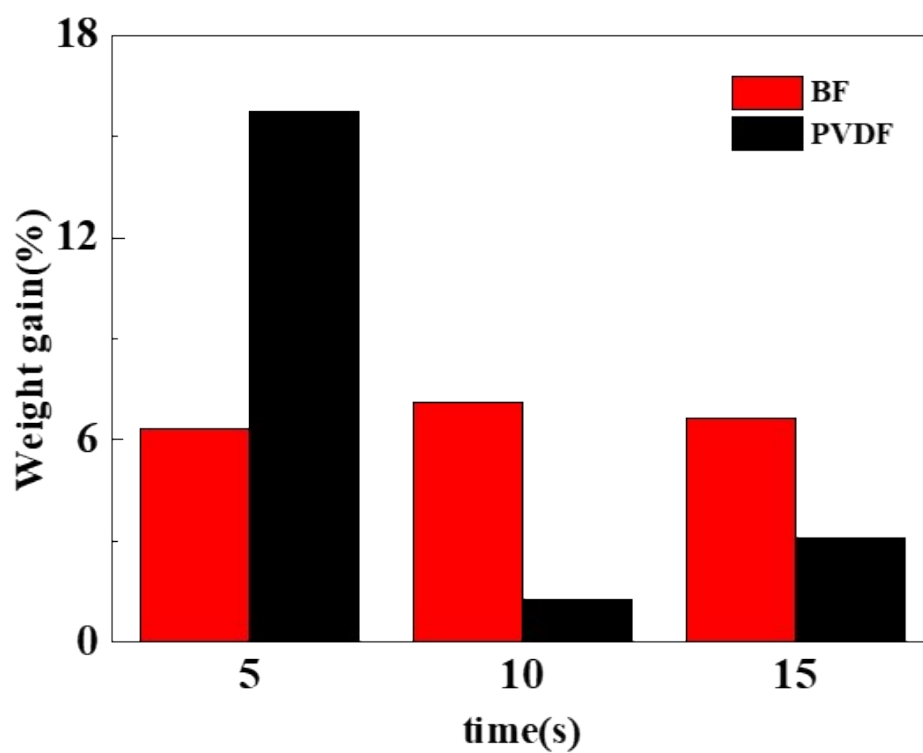

Figure (S12). Capillary effect of electrolyte absorption in BF and PVDF cathode.



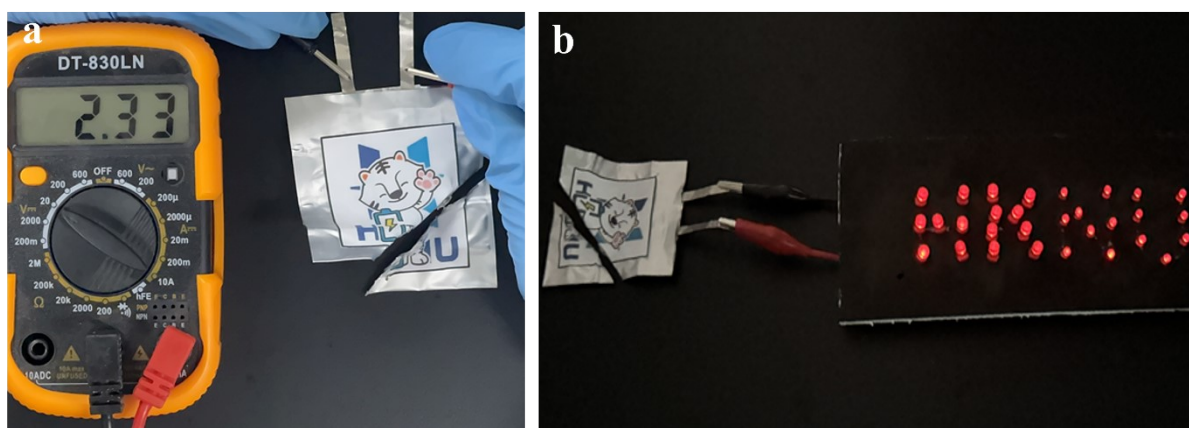

**Figure (S13).** a) Voltage variation of the BF@QSSE pouch cell after cutting. b) Optical photograph of the flexible BF@QSSE pouch cell lighting up LEDs after cutting.
